# Supplementary material
Source: Springer Nature journal article supplement (https://www.springermedizin.de/resource/supplementary/13054_2013_3041_MOESM5_ESM.pdf/9712458)

SjO<sub>2</sub>

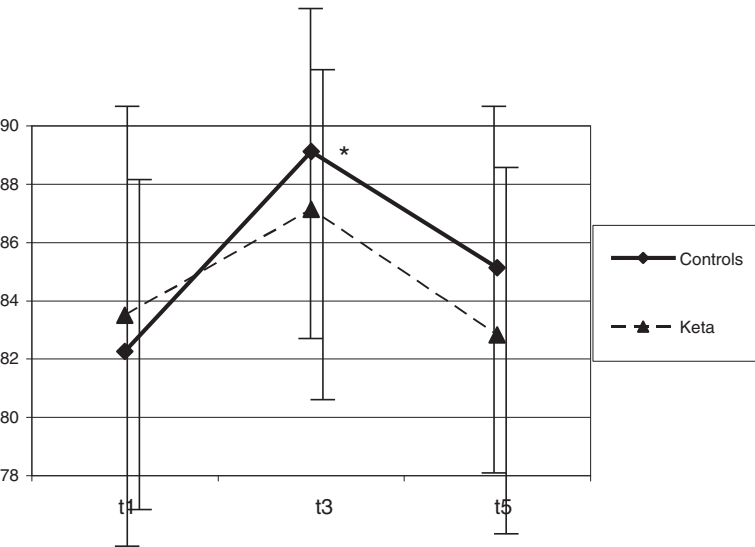

Supplement: MOESM5 [file 9712458]
